# Supplementary material
Source: PubMed Central journal article supplement (PMC10476875)
Supplement: 2022-0165_r3_optimal_-_supplemental_material_(01-23-23)tsrcjt_pzad059.pdf [file 2022-0165_r3_optimal_-_supplemental_material_%2801-23-23%29tsrcjt_pzad059.pdf]

**Supplementary Table: Fit Statistics Used to Determine Number of Latent Classes**

| <b>Number of classes</b> | <b>BIC<sup>a</sup></b> | <b>Entropy<sup>b</sup></b> |
|--------------------------|------------------------|----------------------------|
| <b>1</b>                 | <b>3703.419</b>        | <b>--</b>                  |
| <b>2</b>                 | <b>3617.482</b>        | <b>0.778</b>               |
| <b>3</b>                 | <b>3649.003</b>        | <b>0.769</b>               |
| <b>4</b>                 | <b>3700.220</b>        | <b>0.823</b>               |
| <b>5</b>                 | <b>3754.218</b>        | <b>0.701</b>               |

<sup>a</sup>Bayesian information criterion; lower values indicate better fit

<sup>b</sup>Values closer to 1 indicate better fit
